# Supplementary material
Source: PubMed Central journal article supplement (PMC7999137)
Supplement: btz606_supplementary_data.pdf [file btz606_supplementary_data.pdf]

# Supplementary Materials for circMeta: a unified computational framework for genomic feature annotation and differential expression analysis of circular RNAs

## Derivation of variance of beta-binomial distribution using mean and dispersion parameterization in the proposed hierarchical model

$$\begin{aligned}
 \text{var}(x_{ijl}) &= E(\text{var}(x_{ijl}|\mu_{ij})) + \text{var}(E(x_{ijl}|\mu_{ij})) \\
 &= E(n_{ijl}\mu_{ij}(1 - \mu_{ij})) + \text{var}(n_{ijl}\mu_{ij}) \\
 &= n_{ijl}E(\mu_{ij}(1 - \mu_{ij})) + n_{ijl}\text{var}(\mu_{ij}) \\
 &= n_{ijl}\mu_{ij}(1 - \mu_{ij}) + n_{ijl}\rho_{ij}\mu_{ij}(1 - \mu_{ij}) \\
 &= n_{ijl}\mu_{ij}(1 - \mu_{ij})(1 + \rho_{ij})
 \end{aligned}$$

Thus,  $\hat{\text{var}}(x_{ijl}) = n_{ijl}\hat{\mu}_{ij}(1 - \hat{\mu}_{ij})(1 + \hat{\rho}_{ij})$ . We plug in  $\hat{\mu}_{ij}$  and shrunk estimate  $\hat{\rho}_{ij}$  to obtain the estimate of  $\hat{\text{var}}(x_{ijl})$ .

The MOM estimate of  $\mu_{ij}$  is  $\mu_{ij}$  as  $\hat{\mu}_{ij} = \frac{\sum_l x_{ijl}}{\sum_l n_{ijl}}$ . Thus, we have

$$\begin{aligned}
 \text{var}(\hat{\mu}_{ij}) &= \text{var}\left(\frac{\sum_l x_{ijl}}{\sum_l n_{ijl}}\right) \\
 &= \left(\frac{1}{\sum_l n_{ijl}}\right)^2 \text{var}\left(\sum_l x_{ijl}\right) = \left(\frac{1}{\sum_l n_{ijl}}\right)^2 \sum_l \text{var}(x_{ijl}) = \left(\frac{1}{\sum_l n_{ijl}}\right)^2 \sum_l (n_{ijl}\mu_{ij}(1 - \mu_{ij})(1 + \rho_{ij}))
 \end{aligned}$$

Thus, we could obtain the estimate of  $\hat{\text{var}}(\hat{\mu}_{ij})$  by plugging in estimated  $\hat{\text{var}}(x_{ijl})$ .

## RNA preparing and RT-qPCR

RNA samples from human fetal cortex and cerebellum were QC'ed by Nanodrop and Qubit. 500 ng of RNA was reverse transcribed using random hexamers and SuperScript III (Invitrogen 18080-051) according to the manufacturer's protocol. RT-qPCR was performed using Power SYBR Green PCR Master Mix (Thermo Fisher Scientific 4367659). Relative transcript levels were calculated using the Delta-Delta-CT method. The primers for RT-qPCR are shown in Table S3.

## Figure

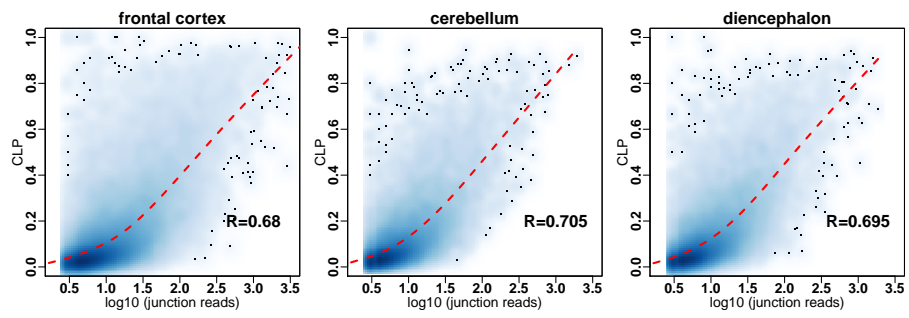

Figure S1: Correlation of logarithmic circular read counts and Circular-to-Linear Proportion (CLP) for common circRNAs identified by findcirc, CIRCexplorer and CIRI in frontal cortex, cerebellum and diencephalon respectively.

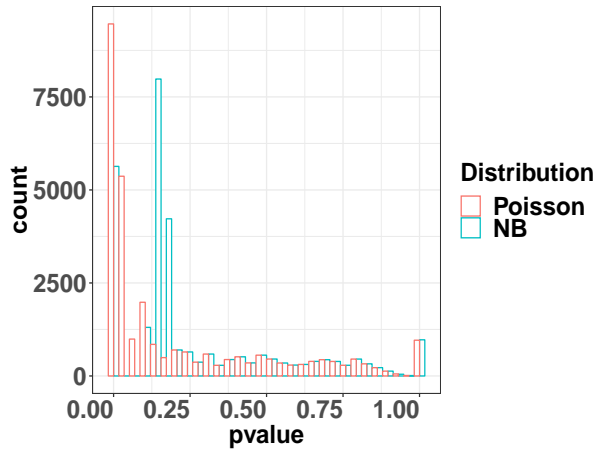

(a) p-values of GOF (frontal cortex)

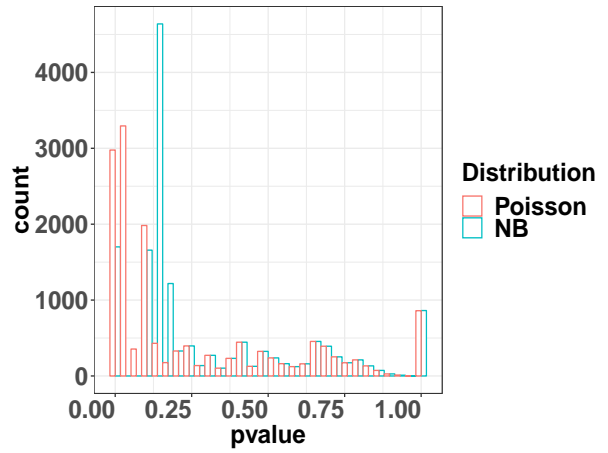

(b) p-values of GOF (cerebellum)

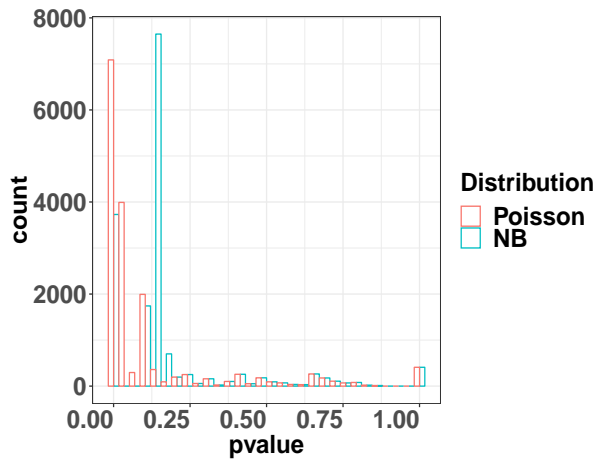

(c) p-values of GOF (diencephalon)

Figure S2: p-values of Goodness Of Fit (GOF) for Poisson distribution and Negative binomial distribution for junction reads of common circRNAs identified by findcirc, CIRCexplorer and CIRI in frontal cortex, cerebellum and diencephalon respectively. The significant level 0.05 is indicated by a dash vertical line.

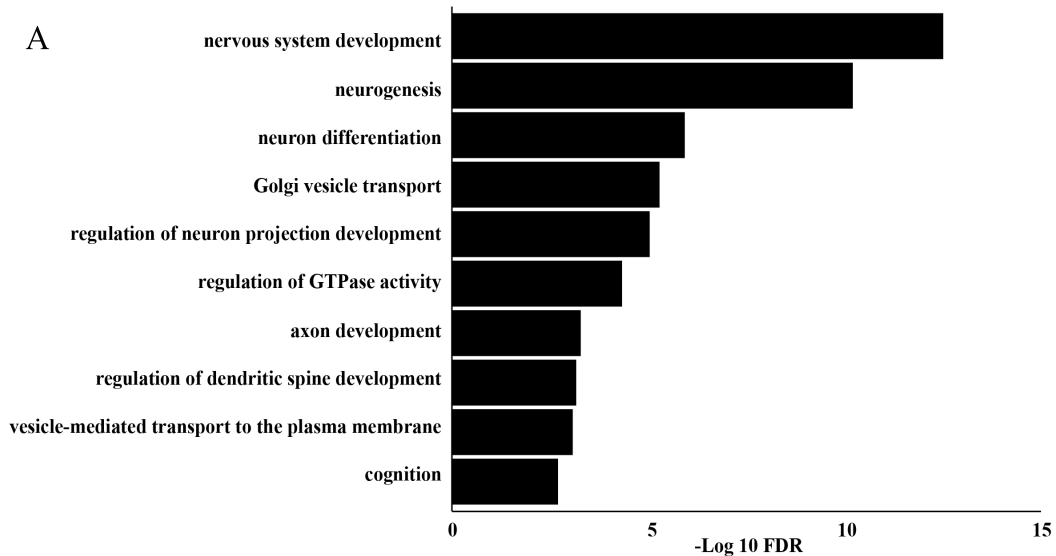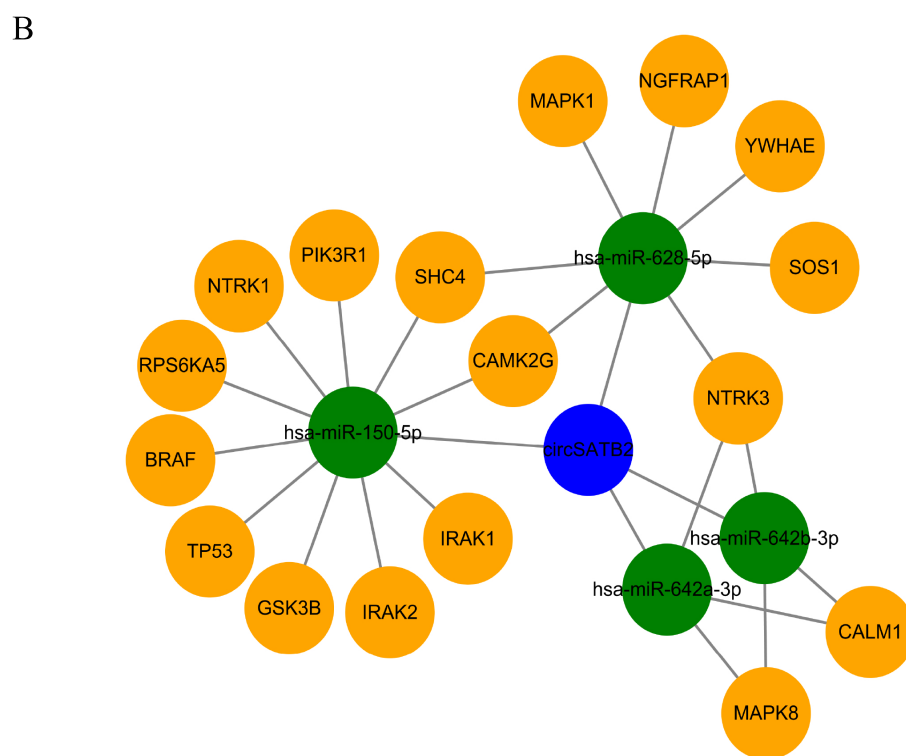

Figure S3: (A) Gene ontology (GO) analysis using host genes harboring circRNAs expressed higher in frontal cortex than cerebellum. Bar charts showing selected biological process ranked by false discovery rate (FDR) ( $FDR < 0.05$ ). (C) The putative miRNAs that could be sponged by circSATB2 are predicted by starBase database and indicated in dark green. The mRNAs regulated by miRNA changes are shown in yellow. miRNAs that are not expressed in corresponding tissues are marked in grey. The circRNA-miRNA-mRNA network is related to ErbB signaling pathway.



Table S1: Expression level (read counts) of miRNAs in cerebellum and frontal cortex associated with circRELL1 and circSATB2

|    | miRNA        | cerebellum | frontal cortex | circRNA   |
|----|--------------|------------|----------------|-----------|
| 1  | hsa-miR-9    | 0          | 0              | circRELL1 |
| 2  | hsa-miR-186  | 34         | 26             | circRELL1 |
| 3  | hsa-miR-526b | 3          | 2              | circRELL1 |
| 4  | hsa-miR-17   | 18         | 3              | circRELL1 |
| 5  | hsa-miR-20a  | 7          | 2              | circRELL1 |
| 6  | hsa-miR-106a | 13         | 3              | circRELL1 |
| 7  | hsa-miR-106b | 29         | 21             | circRELL1 |
| 8  | hsa-miR-20b  | 20         | 6              | circRELL1 |
| 9  | hsa-miR-93   | 41         | 39             | circRELL1 |
| 10 | hsa-miR-302e | 2          | 2              | circRELL1 |
| 11 | hsa-miR-302a | 2          | 2              | circRELL1 |
| 12 | hsa-miR-520e | 3          | 4              | circRELL1 |
| 13 | hsa-miR-520b | 2          | 2              | circRELL1 |
| 14 | hsa-miR-373  | 17         | 7              | circRELL1 |
| 15 | hsa-miR-337  | 11         | 15             | circRELL1 |
| 16 | hsa-miR-150  | 9          | 7              | circSATB2 |
| 17 | hsa-miR-3614 | 57         | 43             | circSATB2 |
| 18 | hsa-miR-628  | 12         | 20             | circSATB2 |
| 19 | hsa-miR-642b | 3          | 2              | circSATB2 |
| 20 | hsa-miR-642a | 12         | 9              | circSATB2 |

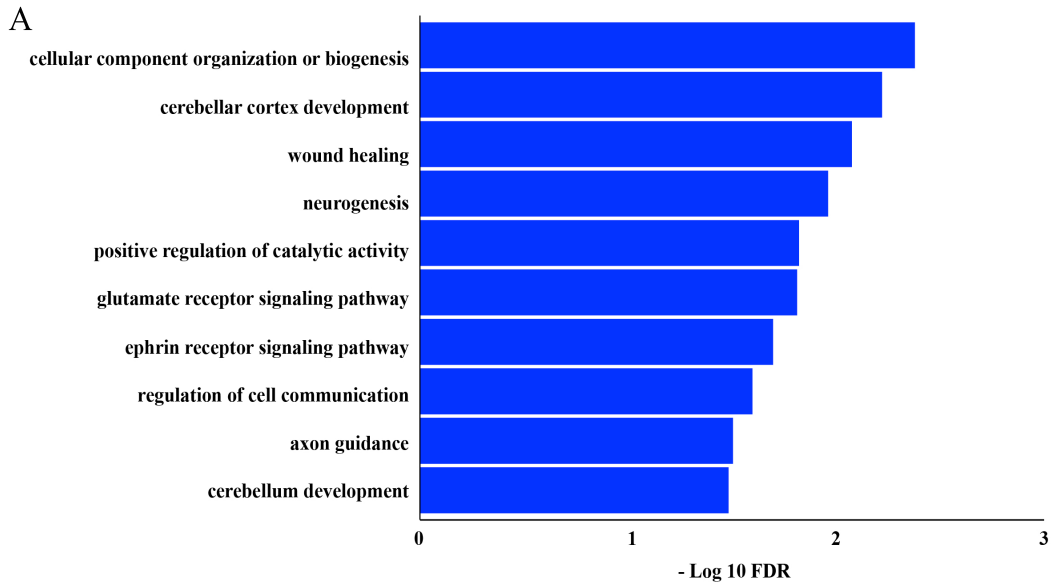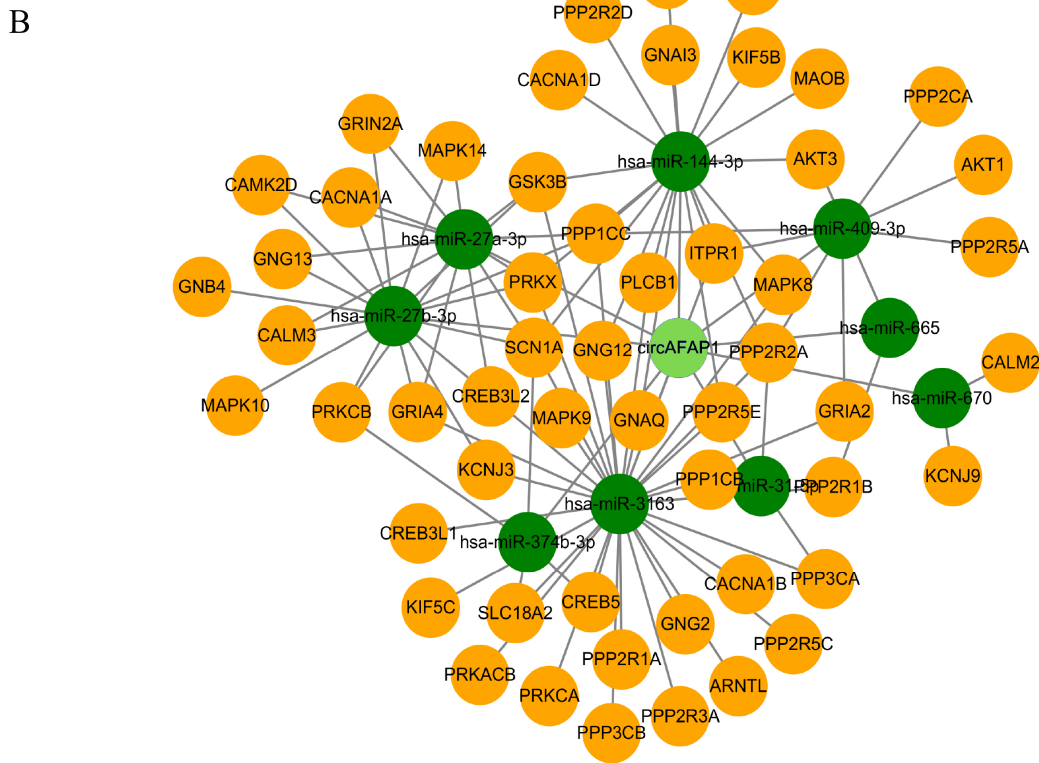

Figure S4: (A) Gene ontology (GO) analysis using host genes producing higher level of circRNAs in cerebellum than diencephalon. Bar charts showing selected biological process ranked by false discovery rate (FDR) ( $FDR < 0.05$ ). (B) The putative miRNAs that could be sponged by circAFAP1 are predicted by starBase database and indicated in dark green. The mRNAs networks that could be affected by miRNA changes is shown in yellow. miRNAs that are not expressed in corresponding tissues are marked in grey. The circRNA-miRNA-mRNA axis is related to dopaminergic synapse.

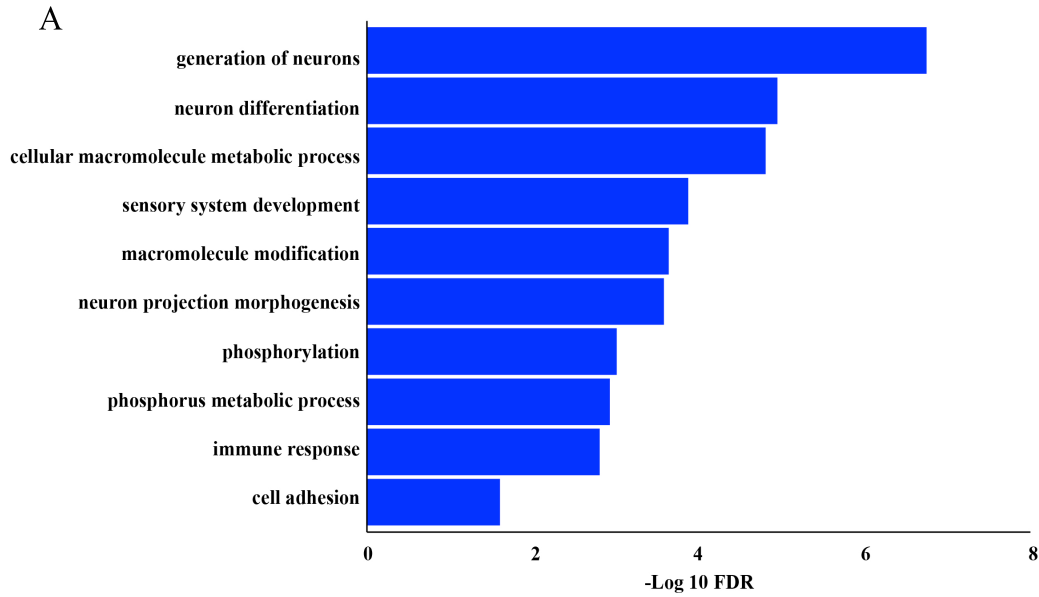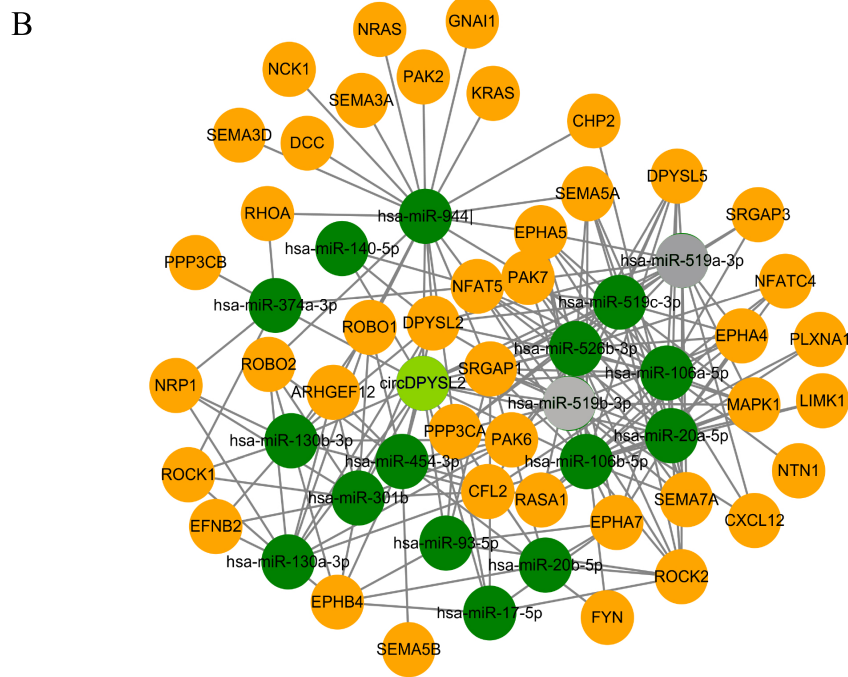

Figure S5: (A) Gene ontology (GO) analysis using host genes producing higher level of circRNAs in di-encephalon than cerebellum. Bar charts showing selected biological process ranked by false discovery rate (FDR) ( $FDR < 0.05$ ). (B) The putative miRNAs that could be sponged by circDPYSL2 are predicted by starBase database and indicated in dark green. The mRNAs networks that could be affected by miRNA changes is shown in yellow. miRNAs that are not expressed in corresponding tissues are marked in grey. The circRNA-miRNA-mRNA axis is related to axon guidance.

Table S2: Expression level (read counts) of miRNAs in cerebellum and diencephalon associated with circAFAP1 and circDPYSL2

|    | miRNA        | cerebellum | diencephalon | circRNA    |
|----|--------------|------------|--------------|------------|
| 1  | hsa-mir-3163 | 10         | 4            | circAFAP1  |
| 2  | hsa-mir-31   | 4          | 5            | circAFAP1  |
| 3  | hsa-mir-27a  | 7          | 7            | circAFAP1  |
| 4  | hsa-mir-27b  | 21         | 26           | circAFAP1  |
| 5  | hsa-mir-144  | 11         | 10           | circAFAP1  |
| 6  | hsa-mir-670  | 10         | 27           | circAFAP1  |
| 7  | hsa-mir-665  | 16         | 10           | circAFAP1  |
| 8  | hsa-mir-374b | 18         | 16           | circAFAP1  |
| 9  | hsa-mir-409  | 18         | 27           | circAFAP1  |
| 10 | hsa-mir-130a | 19         | 18           | circDPYSL2 |
| 11 | hsa-mir-519c | 5          | 6            | circDPYSL2 |
| 12 | hsa-mir-519a | 0          | 0            | circDPYSL2 |
| 13 | hsa-mir-519b | 0          | 3            | circDPYSL2 |
| 14 | hsa-mir-17   | 18         | 4            | circDPYSL2 |
| 15 | hsa-mir-20a  | 7          | 7            | circDPYSL2 |
| 16 | hsa-mir-106a | 13         | 9            | circDPYSL2 |
| 17 | hsa-mir-526b | 3          | 3            | circDPYSL2 |
| 18 | hsa-mir-130b | 45         | 47           | circDPYSL2 |
| 19 | hsa-mir-454  | 41         | 34           | circDPYSL2 |
| 20 | hsa-mir-301b | 8          | 10           | circDPYSL2 |
| 21 | hsa-mir-93   | 41         | 42           | circDPYSL2 |
| 22 | hsa-mir-20b  | 20         | 11           | circDPYSL2 |
| 23 | hsa-mir-106b | 29         | 22           | circDPYSL2 |
| 24 | hsa-mir-944  | 18         | 3            | circDPYSL2 |
| 25 | hsa-mir-374a | 23         | 13           | circDPYSL2 |
| 26 | hsa-mir-140  | 22         | 12           | circDPYSL2 |

Table S3: Primers for RT-qPCR

| Primer.Name               | species | Sequence                |
|---------------------------|---------|-------------------------|
| circRELL1_F_qPCR          | human   | GTCAAACCAGAAGGAACGGA    |
| circRELL1_R_qPCR          | human   | ACATCCCTCTCGACAACACC    |
| circZFAND6_F_qPCR         | human   | CCAGTTCAATGCACAGATGG    |
| circZFAND6_R_qPCR         | human   | AAGCATAGGCACTTGGCTGT    |
| circKCNN2_F_qPCR          | human   | TCTGATTGCCAGAGTCATGC    |
| circKCNN2_R_qPCR          | human   | TCCAGTCATCTGCTCCATTG    |
| circSATB2_F_detect        | human   | AAGATGTCTATCATGTTGTG    |
| circSATB2_R_detect        | human   | GGCCACTGTCGCGTCGGGTG    |
| circRAPGEF5_F             | human   | ACTGCAACTTGTGCCTCTCA    |
| circRAPGEF5_R             | human   | GCACTGGACGAAAGGACAGT    |
| circATRNL1_F1_detect/qPCR | human   | ATTGCTCTGGTCATGGGAAG    |
| circATRNL1_R1_detect/qPCR | human   | TCATTGCCCTTATTTTCAGG    |
| hGAPDH-R                  | human   | GGCTGTTGTCATACTTCTCATGG |
| hGAPDH-F                  | human   | GGAGCGAGATCCCTCCAAAAT   |

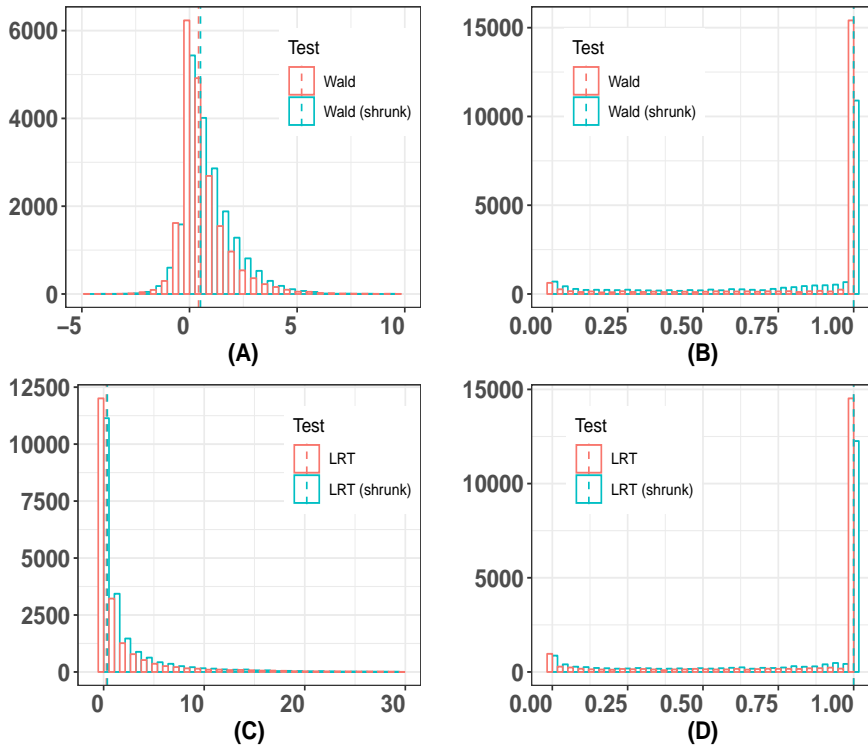

Figure S6: Differentially expressed circRNA analysis between frontal cortex and diencephalon. (A,B) Comparison of statistics distribution and FDR distribution between Wald test vs Wald test (shrunk); (C,D) Comparison of statistics distribution and FDR distribution between LRT vs LRT (shrunk). The median of test statistics or FDR is indicated by a dash vertical line.

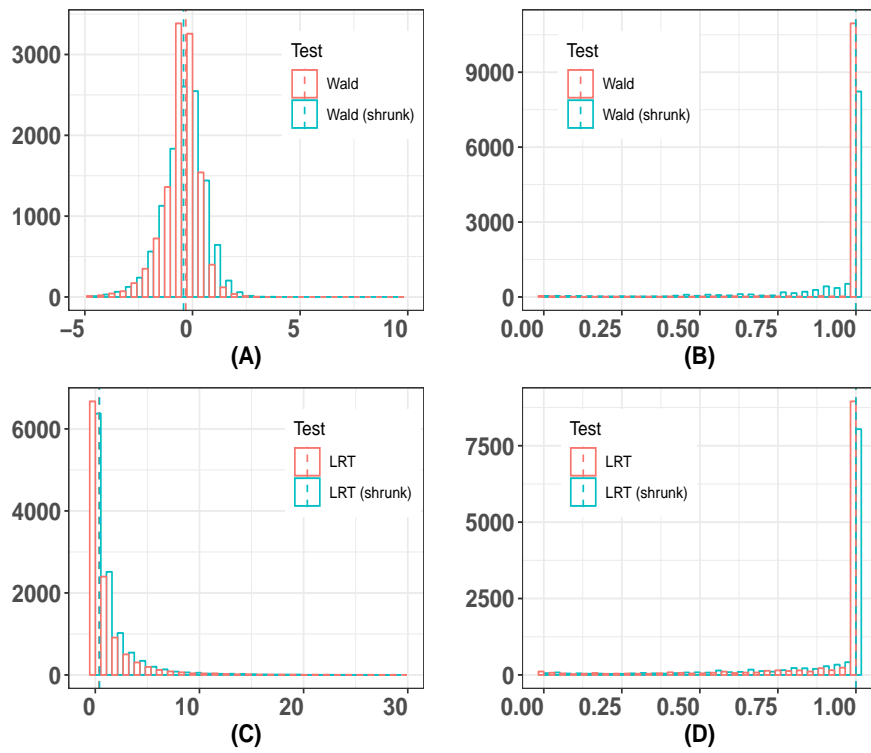

Figure S7: Differentially expressed circRNA analysis between cerebellum and diencephalon. (A,B) Comparison of statistics distribution and FDR distribution between Wald test vs Wald test (shrunk); (C,D) Comparison of statistics distribution and FDR distribution between LRT vs LRT (shrunk). The median of test statistics or FDR is indicated by a dash vertical line.
